# Supplementary material
Source: PubMed Central journal article supplement (PMC2657882)
Supplement: neo1104_0365SD1.pdf [file neo1104_0365SD1.pdf]

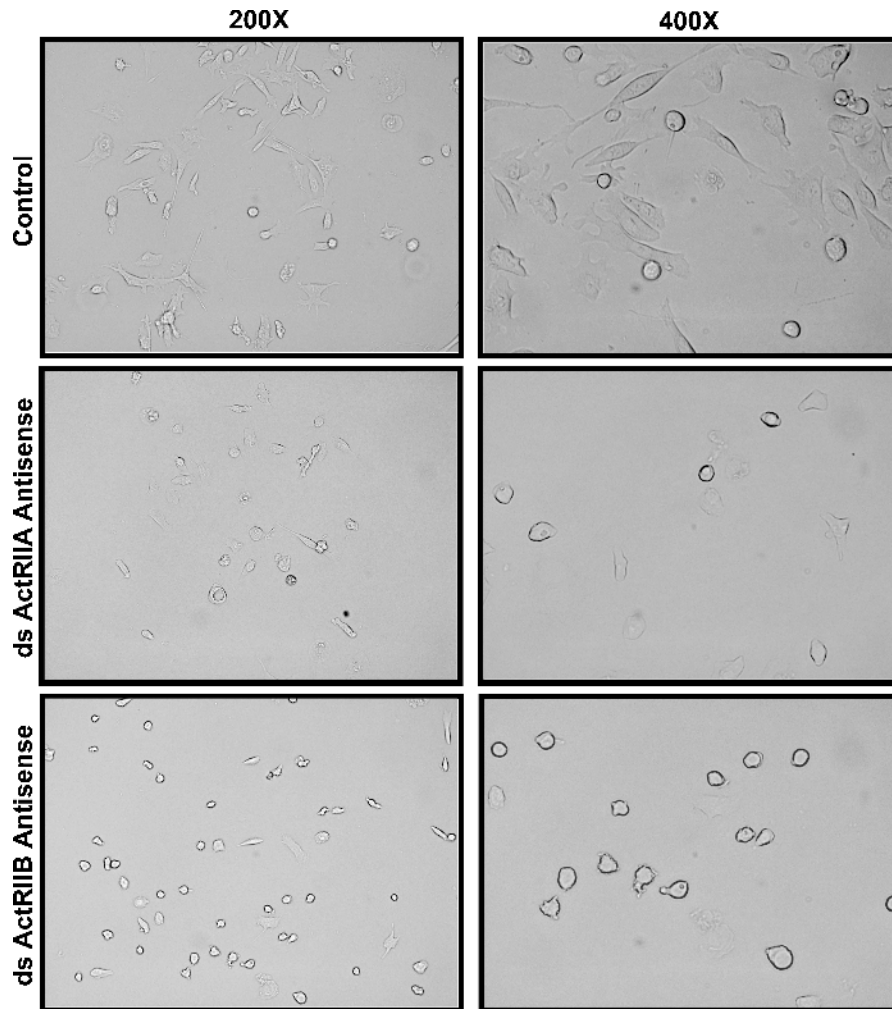

**Figure W1.** Suppression of ActRII signaling induces morphological changes in PCC. Antisense and sense oligonucleotides were designed against ActRIIA or ActRIIB from positions near the cDNA start codon and synthesized by integrated DNA Technologies (Coralville, IA; see Table 1). Each oligonucleotide was dissolved in sterile doubly deionized H<sub>2</sub>O to a final concentration of 100  $\mu$ M. Double-stranded (ds) antisense was prepared by incubating the sense and the antisense oligonucleotides at 94°C before cooling to room temperature. PC-3 cells were cultured in F12 medium with 5% serum for 1 day before treatment  $\pm$  ActRIIA or ActRIIB ds antisense or sense oligonucleotides for 3 days. Magnification is given on the figure. Scale, 50  $\mu$ m.
